# Supplementary material
Source: publisher site journal article supplement (https://www.dovepress.com/article/312770)
Supplement: Supplementary file 1 [file get_supplementary_file.php]

## Supplement 1

### Sensitive group

| term                                         | es       | nes      | p | q        | geneNo | pct   | leadFC |
|----------------------------------------------|----------|----------|---|----------|--------|-------|--------|
| GO_CHEMOKINE_ACTIVITY                        | 0.657652 | 2.012104 | 0 | 0.0031   | 47     | 0.489 | 24.933 |
| LEE_LIVER_CANCER_MYC_TGFA_DN                 | 0.626162 | 2.255945 | 0 | 6.12E-05 | 64     | 0.562 | 5.764  |
| GO_REGULATION_OF_LIPOPROTEIN_LIPASE_ACTIVITY | 0.71324  | 2.045248 | 0 | 0.00218  | 24     | 0.625 | 15.692 |
| LEE_LIVER_CANCER_SURVIVAL_UP                 | 0.470228 | 2.025048 | 0 | 0.00278  | 184    | 0.429 | 7.992  |
| LEE_LIVER_CANCER_ACOX1_DN                    | 0.542582 | 1.97407  | 0 | 0.00483  | 65     | 0.554 | 5.672  |
| HOSHIDA_LIVER_CANCER_SUBCLASS_S3             | 0.414317 | 1.893403 | 0 | 0.00972  | 265    | 0.442 | 7.698  |
| LEE_LIVER_CANCER_DENA_DN                     | 0.519861 | 1.862994 | 0 | 0.013    | 74     | 0.446 | 5.891  |
| REACTOME_FORMATION_OF_FIBRIN_CLOT_CLOTTING   | 0.551953 | 1.830191 | 0 | 0.01693  | 39     | 0.538 | 27.732 |
| WOO_LIVER_CANCER_RECURRENCE_DN               | 0.472666 | 1.803018 | 0 | 0.0207   | 78     | 0.436 | 7.503  |
| SERVITJA_ISLET_HNF1A_TARGETS_DN              | 0.562453 | 2.21848  | 0 | 0.00023  | 107    | 0.523 | 12.886 |
| GO_FATTY_ACID_BINDING                        | 0.580397 | 1.879041 | 0 | 0.01137  | 39     | 0.513 | 25.997 |
| GO_REGULATION_OF_DNA_REPLICATION             | 0.461263 | 1.928151 | 0 | 0.00718  | 111    | 0.333 | 2.349  |

### Resistant group

| term                                               | es        | nes       | p | q       | geneNo | pct   | leadFC |
|----------------------------------------------------|-----------|-----------|---|---------|--------|-------|--------|
| MEBARKI_HCC_PROGENITOR_WNT_UP_CTNNB1_INDEPENDENT   | -0.735497 | -2.175221 | 0 | 0.0011  | 24     | 0.625 | 31.494 |
| STEGER_ADIPOGENESIS_DN                             | -0.700805 | -2.07138  | 0 | 0.004   | 24     | 0.542 | 73.491 |
| REACTOME_SIGNALING_BY_PDGF                         | -0.457052 | -1.674236 | 0 | 0.06875 | 58     | 0.414 | 18.379 |
| GO_COLLAGEN_FIBRIL_ORGANIZATION                    | -0.61874  | -2.25321  | 0 | 0.0005  | 55     | 0.564 | 29.182 |
| JECHLINGER_EPITHELIAL_TO_MESENCHYMAL_TRANSITION_UP | -0.581989 | -2.244427 | 0 | 0.00048 | 67     | 0.507 | 28.517 |
| GO_BASEMENT_MEMBRANE                               | -0.521862 | -2.117274 | 0 | 0.00229 | 103    | 0.495 | 11.984 |
| KEGG_ECM_RECEPTOR_INTERACTION                      | -0.523889 | -2.03403  | 0 | 0.00619 | 84     | 0.512 | 26.899 |
| KIM_HYPOXIA                                        | -0.644429 | -1.829555 | 0 | 0.03151 | 17     | 0.412 | 3.269  |
| WOO_LIVER_CANCER_RECURRENCE_UP                     | -0.414063 | -1.750644 | 0 | 0.04948 | 104    | 0.404 | 8.012  |
| HUANG_DASATINIB_RESISTANCE_UP                      | -0.655525 | -2.584306 | 0 | 0       | 78     | 0.628 | 10.14  |

## Supplement 2

### Sensitive group

| term                                                       | es       | nes      | p | q | geneNo | pct   | leadFC |
|------------------------------------------------------------|----------|----------|---|---|--------|-------|--------|
| GNF2_LCAT                                                  | 0.672858 | 2.763401 | 0 | 0 | 124    | 0.613 | 19.935 |
| GNF2_HPX                                                   | 0.664673 | 2.723419 | 0 | 0 | 135    | 0.615 | 22.588 |
| GNF2_HPNI                                                  | 0.660768 | 2.689661 | 0 | 0 | 134    | 0.619 | 17.679 |
| AIZARANI_LIVER_C17_HEPATOCYTES_3                           | 0.66812  | 2.687396 | 0 | 0 | 102    | 0.618 | 51.091 |
| MANALO_HYPOXIA_DN                                          | 0.564186 | 2.681867 | 0 | 0 | 286    | 0.339 | 2.132  |
| HALLMARK_E2F_TARGETS                                       | 0.580632 | 2.659341 | 0 | 0 | 198    | 0.359 | 2.102  |
| HSIAO_LIVER_SPECIFIC_GENES                                 | 0.587281 | 2.656614 | 0 | 0 | 249    | 0.586 | 24.912 |
| AIZARANI_LIVER_C14_HEPATOCYTES_2                           | 0.577865 | 2.588725 | 0 | 0 | 225    | 0.551 | 20.858 |
| MODULE_8                                                   | 0.521455 | 2.555847 | 0 | 0 | 416    | 0.377 | 2.731  |
| GNF2_GSTM1                                                 | 0.64054  | 2.52192  | 0 | 0 | 109    | 0.578 | 19.313 |
| DUTERTRE ESTRADIOL_RESPONSE_24HR_UP                        | 0.524509 | 2.509006 | 0 | 0 | 319    | 0.398 | 2.262  |
| SOTIRIOU_BREAST_CANCER_GRADE_1_VS_3_UP                     | 0.568746 | 2.508156 | 0 | 0 | 150    | 0.387 | 2.074  |
| GNF2_TST                                                   | 0.630887 | 2.484063 | 0 | 0 | 104    | 0.606 | 20.578 |
| CAR_HPX                                                    | 0.697248 | 2.482988 | 0 | 0 | 73     | 0.685 | 32.593 |
| GAO_SMALL_INTESTINE_24W_C4_ENTEROCYTE_PROGENITOR_SUBTYPE_2 | 0.639577 | 2.475842 | 0 | 0 | 97     | 0.588 | 13.136 |
| MUELLER_PLURINET                                           | 0.51749  | 2.447742 | 0 | 0 | 297    | 0.3   | 2.22   |
| AIZARANI_LIVER_C11_HEPATOCYTES_1                           | 0.520308 | 2.44747  | 0 | 0 | 296    | 0.541 | 16.651 |
| FAN_EMBRYONIC_CTX_MICROGLIA_1                              | 0.55725  | 2.428236 | 0 | 0 | 149    | 0.315 | 2.046  |
| ZHOU_CELL_CYCLE_GENES_IN_IR_RESPONSE_6HR                   | 0.611882 | 2.424119 | 0 | 0 | 82     | 0.39  | 2.127  |
| REACTOME_G2_M_CHECKPOINTS                                  | 0.565066 | 2.423994 | 0 | 0 | 134    | 0.351 | 2.139  |
| ROSTY_CERVICAL_CANCER_PROLIFERATION_CLUSTER                | 0.562917 | 2.41686  | 0 | 0 | 138    | 0.42  | 2.191  |
| GO_DNA_DEPENDENT_DNA_REPLICATION                           | 0.547692 | 2.414437 | 0 | 0 | 151    | 0.377 | 2.099  |
| GNF2_CEBPA                                                 | 0.665523 | 2.404393 | 0 | 0 | 64     | 0.625 | 19.935 |
| BENPORATH_PROLIFERATION                                    | 0.555239 | 2.401085 | 0 | 0 | 142    | 0.338 | 2.171  |
| GNF2_PCNA                                                  | 0.628484 | 2.384347 | 0 | 0 | 67     | 0.373 | 2.107  |
| GSE22886_UNSTIM_VS_IL15_STIM_NKCELL_DN                     | 0.528274 | 2.377719 | 0 | 0 | 195    | 0.374 | 2.21   |

| term                                                                    | es       | nes      | p | q       | geneNo | pct   | leadFC |
|-------------------------------------------------------------------------|----------|----------|---|---------|--------|-------|--------|
| GNF2_CCNA2                                                              | 0.625324 | 2.369808 | 0 | 0       | 67     | 0.403 | 2.102  |
| KANG_DOXORUBICIN_RESISTANCE_UP                                          | 0.643258 | 2.367318 | 0 | 0       | 54     | 0.389 | 2.384  |
| GNF2_RRM1                                                               | 0.60107  | 2.360866 | 0 | 0       | 87     | 0.368 | 2.218  |
| WP_DNA_REPLICATION                                                      | 0.685941 | 2.360731 | 0 | 0       | 42     | 0.548 | 2.091  |
| GSE5679_CTRL_VS_PPARG_LIGAND_ROSIGLITAZONE_TREATED_DC_UP                | 0.52668  | 2.356942 | 0 | 0       | 193    | 0.352 | 2.198  |
| REACTOME_ACTIVATION_OF_ATR_IN_RESPONSE_TO_REPLICATION_STRESS            | 0.703146 | 2.353807 | 0 | 0       | 37     | 0.568 | 2.102  |
| REACTOME_DNA_REPLICATION                                                | 0.55284  | 2.350811 | 0 | 0       | 128    | 0.359 | 2.121  |
| GNF2_RFC4                                                               | 0.629305 | 2.345567 | 0 | 2.2E-05 | 59     | 0.356 | 2.102  |
| BLANCO_MELO_BRONCHIAL_EPITHELIAL_CELLS_INFLUENZA_A_DEL_NS1_INFECTION_DN | 0.527842 | 2.338127 | 0 | 2.1E-05 | 185    | 0.411 | 2.188  |
| REACTOME_HOMOLOGOUS_DNA_PAIRING_AND_STRAND_EXCHANGE                     | 0.683849 | 2.326631 | 0 | 2E-05   | 42     | 0.381 | 2.212  |
| GNF2_CDC2                                                               | 0.606886 | 2.315728 | 0 | 1.9E-05 | 61     | 0.344 | 2.064  |
| REACTOME_ACTIVATION_OF_THE_PRE_REPLICATIVE_COMPLEX                      | 0.719646 | 2.315663 | 0 | 1.9E-05 | 33     | 0.576 | 2.064  |
| CAR_IGFBP1                                                              | 0.675217 | 2.314688 | 0 | 1.8E-05 | 57     | 0.702 | 25.29  |
| GNF2_SMC4L1                                                             | 0.590487 | 2.31408  | 0 | 1.8E-05 | 83     | 0.325 | 2.217  |
| HP_SIDEROBLASTIC_ANEMIA                                                 | 0.699939 | 2.310126 | 0 | 1.7E-05 | 33     | 0.333 | 2.017  |
| REACTOME_DNA_REPLICATION_PRE_INITIATION                                 | 0.584221 | 2.29905  | 0 | 5.1E-05 | 85     | 0.412 | 2.064  |
| BLANCO_MELO_HUMAN_PARAINFLUENZA_VIRUS_3_INFECTION_A594_CELLS_DN         | 0.543355 | 2.29435  | 0 | 4.9E-05 | 118    | 0.559 | 9.535  |
| GAO_LARGE_INTESTINE_ADULT_CH_MKI67HIGH_CELLS                            | 0.561546 | 2.289986 | 0 | 4.7E-05 | 104    | 0.375 | 2.27   |
| KEGG_MATURITY_ONSET_DIABETES_OF_THE_YOUNG                               | 0.803019 | 2.289408 | 0 | 4.6E-05 | 25     | 0.56  | 42.408 |
| REACTOME_CHROMOSOME_MAINTENANCE                                         | 0.557177 | 2.287756 | 0 | 4.5E-05 | 92     | 0.348 | 2.21   |
| REACTOME_HDR_THROUGH_HOMOLOGOUS_RECOMBINATION_HRR                       | 0.604019 | 2.279671 | 0 | 4.3E-05 | 67     | 0.313 | 2.193  |
| GNF2_CENPF                                                              | 0.614892 | 2.274119 | 0 | 4.3E-05 | 61     | 0.361 | 2.031  |

| term                             | es       | nes      | p | q       | geneNo | pct   | leadFC |
|----------------------------------|----------|----------|---|---------|--------|-------|--------|
| SONG_TARGETS_OF_IE86_CMV_PROTEIN | 0.62071  | 2.271684 | 0 | 4.2E-05 | 54     | 0.426 | 1.999  |
| CROONQUIST_IL6_DEPRIVATION_DN    | 0.565881 | 2.270153 | 0 | 5.5E-05 | 94     | 0.426 | 2.158  |

### Resistant group

| term                                                            | es        | nes       | p | q | geneNo | pct   | leadFC |
|-----------------------------------------------------------------|-----------|-----------|---|---|--------|-------|--------|
| WANG_SMARCE1_TARGETS_UP                                         | -0.611851 | -2.940414 | 0 | 0 | 287    | 0.537 | 9.072  |
| HALLMARK_EPITHELIAL_MESENCHYMAL_TRANSITION                      | -0.632545 | -2.929763 | 0 | 0 | 198    | 0.631 | 25.387 |
| SCHUETZ_BREAST_CANCER_DUCTAL_INVASIVE_UP                        | -0.593547 | -2.898839 | 0 | 0 | 346    | 0.587 | 11.333 |
| ANASTASSIOU_MULTICANCER_INVASIVENESS_SIGNATURE                  | -0.752657 | -2.840556 | 0 | 0 | 64     | 0.656 | 46.94  |
| CHARAFE_BREAST_CANCER_LUMINAL_VS_MESENCHYMAL_DN                 | -0.56247  | -2.832176 | 0 | 0 | 459    | 0.481 | 11.984 |
| GAO_LARGE_INTESTINE_ADULT_CJ_IMMUNE_CELLS                       | -0.557267 | -2.798794 | 0 | 0 | 502    | 0.514 | 10.346 |
| ONDER_CDH1_TARGETS_2_UP                                         | -0.568392 | -2.742936 | 0 | 0 | 250    | 0.556 | 11.604 |
| AIZARANI_LIVER_C21_STELLATE_CELLS_1                             | -0.584216 | -2.640184 | 0 | 0 | 192    | 0.589 | 6.411  |
| LIM_MAMMARY_STEM_CELL_UP                                        | -0.520996 | -2.597996 | 0 | 0 | 472    | 0.475 | 7.534  |
| HUANG_DASATINIB_RESISTANCE_UP                                   | -0.655525 | -2.584306 | 0 | 0 | 78     | 0.628 | 10.14  |
| BOQUEST_STEM_CELL_UP                                            | -0.548448 | -2.580178 | 0 | 0 | 258    | 0.547 | 11.604 |
| SENESE_HDAC1_AND_HDAC2_TARGETS_DN                               | -0.557633 | -2.574752 | 0 | 0 | 228    | 0.522 | 7.062  |
| VECCHI_GASTRIC_CANCER_ADVANCED_VS_EARLY_UP                      | -0.561846 | -2.518914 | 0 | 0 | 171    | 0.602 | 10.211 |
| MODULE_47                                                       | -0.539342 | -2.518081 | 0 | 0 | 224    | 0.603 | 12.755 |
| CHARAFE_BREAST_CANCER_LUMINAL_VS_BASAL_DN                       | -0.496942 | -2.510299 | 0 | 0 | 448    | 0.433 | 10.598 |
| BLANCO_MELO_HUMAN_PARAINFLUENZA_VIRUS_3_INFECTION_A594_CELLS_UP | -0.547322 | -2.507976 | 0 | 0 | 199    | 0.487 | 9.202  |
| GAO_LARGE_INTESTINE_24W_C1_DCLK1POS_PROGENITOR                  | -0.621453 | -2.502035 | 0 | 0 | 99     | 0.586 | 23.666 |
| MIYAGAWA_TARGETS_OF_EWSR1_ETS_FUSIONS_DN                        | -0.533108 | -2.496406 | 0 | 0 | 231    | 0.472 | 12.536 |

| term                                                                       | es        | nes       | p | q        | geneNo | pct   | leadFC |
|----------------------------------------------------------------------------|-----------|-----------|---|----------|--------|-------|--------|
| PETROVA_ENDOTHELIUM_LYMPHATIC_VS_BLOOD_DN                                  | -0.559423 | -2.493275 | 0 | 0        | 162    | 0.543 | 11.551 |
| RIGGI_EWING_SARCOMA_PROGENITOR_DN                                          | -0.547994 | -2.475181 | 0 | 0        | 192    | 0.484 | 8.07   |
| AIZARANI_LIVER_C10_MVECS_1                                                 | -0.520332 | -2.460186 | 0 | 0        | 265    | 0.464 | 6.444  |
| VERRECCHIA_EARLY_RESPONSE_TO_TGFB1                                         | -0.659045 | -2.449676 | 0 | 0        | 54     | 0.537 | 29.334 |
| AIZARANI_LIVER_C29_MVECS_2                                                 | -0.507592 | -2.434855 | 0 | 0        | 308    | 0.468 | 6.833  |
| MODULE_1                                                                   | -0.499383 | -2.432406 | 0 | 0        | 362    | 0.453 | 6.068  |
| BROWNE_HCMV_INFECTION_24HR_DN                                              | -0.553498 | -2.421337 | 0 | 0        | 142    | 0.451 | 7.658  |
| GO_EXTRACELLULAR_MATRIX_STRUCTURAL_CONSTITUENT                             | -0.570939 | -2.419084 | 0 | 4.77E-05 | 168    | 0.518 | 14.34  |
| FAN_EMBRYONIC_CTX_BRAIN_ENDOTHELIAL_2                                      | -0.502957 | -2.416368 | 0 | 4.59E-05 | 299    | 0.458 | 6.05   |
| MEBARKI_HCC_PROGENITOR_WNT_UP                                              | -0.536932 | -2.408009 | 0 | 4.43E-05 | 196    | 0.556 | 13.168 |
| GO_EXTRACELLULAR_MATRIX_STRUCTURAL_CONSTITUENT_CONFERRING_TENSILE_STRENGTH | -0.719148 | -2.407189 | 0 | 4.28E-05 | 41     | 0.634 | 47.951 |
| HU_FETAL_RETINA_FIBROBLAST                                                 | -0.486971 | -2.402831 | 0 | 4.13E-05 | 381    | 0.459 | 6.69   |
| CLASPER_LYMPHATIC_VESSELS_DURING_METASTASIS_DN                             | -0.707825 | -2.393484 | 0 | 4.00E-05 | 35     | 0.657 | 33.128 |
| CSR_LATE_UP.V1_DN                                                          | -0.542933 | -2.392405 | 0 | 3.88E-05 | 144    | 0.465 | 7.574  |
| KINSEY_TARGETS_OF_EWSR1_FLI1_FUSION_DN                                     | -0.492972 | -2.392308 | 0 | 3.76E-05 | 324    | 0.42  | 3.879  |
| HENDRICKS_SMARCA4_TARGETS_UP                                               | -0.648039 | -2.386856 | 0 | 3.65E-05 | 54     | 0.704 | 5.921  |
| REN_ALVEOLAR_RHABDOMYOSARCOMA_DN                                           | -0.474534 | -2.38374  | 0 | 3.54E-05 | 405    | 0.375 | 5.939  |
| WP_MIRNA_TARGETS_IN_ECM_AND_MEMBRANE_RECEPTORS                             | -0.710965 | -2.383408 | 0 | 3.45E-05 | 42     | 0.476 | 79.976 |
| REACTOME_ECM_PROTEOGLYCANS                                                 | -0.6357   | -2.382562 | 0 | 3.35E-05 | 76     | 0.566 | 26.899 |
| PICCALUGA_ANGIOIMMUNOBLASTIC_LYMPHOMA_UP                                   | -0.525448 | -2.381114 | 0 | 6.52E-05 | 208    | 0.495 | 7.349  |
| REACTOME_COLLAGEN_CHAIN_TRIMERIZATION                                      | -0.697647 | -2.3789   | 0 | 6.35E-05 | 44     | 0.636 | 35.989 |
| DURANTE_ADULT_OLFACTORY_NEUROEPITHELIUM_FIBROBLASTS_STROMAL_CELLS          | -0.603592 | -2.377641 | 0 | 6.19E-05 | 81     | 0.568 | 11.503 |
| NABA_COLLAGENS                                                             | -0.697647 | -2.375186 | 0 | 6.04E-05 | 44     | 0.636 | 35.989 |

| term                                                                 | es        | nes       | p | q        | geneNo | pct   | leadFC |
|----------------------------------------------------------------------|-----------|-----------|---|----------|--------|-------|--------|
| CHARAFE_BREAST_CANCER_BASAL_VS_MESENCHYMAL_DN                        | -0.643101 | -2.374664 | 0 | 5.90E-05 | 51     | 0.667 | 7.19   |
| GO_COLLAGEN_TRIMER                                                   | -0.622579 | -2.369353 | 0 | 5.76E-05 | 87     | 0.494 | 14.708 |
| GNF2_CDH11                                                           | -0.750493 | -2.364806 | 0 | 5.63E-05 | 25     | 0.84  | 29.182 |
| BERTUCCI_MEDULLARY_VS_DUCTAL_BREAST_CANCER_DN                        | -0.519086 | -2.354986 | 0 | 8.20E-05 | 170    | 0.459 | 8.346  |
| HALLMARK_UV_RESPONSE_DN                                              | -0.53719  | -2.354751 | 0 | 8.02E-05 | 142    | 0.43  | 6.577  |
| WILCOX_RESPONSE_TO_PROGESTERONE_DN                                   | -0.621176 | -2.339614 | 0 | 0.0001   | 62     | 0.597 | 10.422 |
| SWEET_KRAS_TARGETS_UP                                                | -0.590008 | -2.330094 | 0 | 0.00013  | 81     | 0.605 | 6.177  |
| BROWNE_HCMV_INFECTION_20HR_DN                                        | -0.563798 | -2.327204 | 0 | 0.00015  | 96     | 0.406 | 10.091 |
| GO_REGULATION_OF_FIBROBLAST_GROWTH_FACTOR_RECEPTOR_SIGNALING_PATHWAY | -0.689805 | -2.315119 | 0 | 0.0002   | 40     | 0.475 | 20.189 |

### Supplement 3

| gene_id            | gene_name | gene_type      |
|--------------------|-----------|----------------|
| ENSG00000042980.11 | ADAM28    | protein_coding |
| ENSG00000129038.14 | LOXL1     | protein_coding |
| ENSG00000136235.14 | GPNMB     | protein_coding |
| ENSG00000133636.9  | NTS       | protein_coding |
| ENSG00000198019.11 | FCGR1B    | protein_coding |
| ENSG00000164692.16 | COL1A2    | protein_coding |
| ENSG00000123095.5  | BHLHE41   | protein_coding |
| ENSG00000078098.12 | FAP       | protein_coding |
| ENSG00000108821.12 | COL1A1    | protein_coding |
| ENSG00000197956.8  | S100A6    | protein_coding |
| ENSG00000168542.11 | COL3A1    | protein_coding |
| ENSG00000026751.15 | SLAMF7    | protein_coding |
| ENSG00000090104.10 | RGS1      | protein_coding |
| ENSG00000106624.7  | AEBP1     | protein_coding |
| ENSG00000134028.13 | ADAMDEC1  | protein_coding |
| ENSG00000100979.13 | PLTP      | protein_coding |
| ENSG00000124225.14 | PMEPA1    | protein_coding |
| ENSG00000100985.7  | MMP9      | protein_coding |
| ENSG00000077274.8  | CAPN6     | protein_coding |
| ENSG00000164694.15 | FNDC1     | protein_coding |
